# Supplementary material for: Friend or Foe? Early Social Evaluation of Human Interactions
Source: PubMed Central journal article supplement (PMC3929526; doi:10.1371/journal.pone.0088612), 2014-02-19
Supplement: pone.0088612.s001.pdf [file pone.0088612.s001.pdf]

**Table S1: Results obtained for each question asked in Experiment 1**

| Questionnaires                      | Questions                                | Mean (SD)   | Statistics <sup>1</sup>     |
|-------------------------------------|------------------------------------------|-------------|-----------------------------|
| First questionnaire <sup>2</sup>    | Do you like him?                         | 0.28 (0.16) | t(27) = 1.68 <sup>n.s</sup> |
|                                     | Is he a good guy or a bad guy?           | 0.05 (0.16) | t(27) < 0 <sup>n.s</sup>    |
|                                     | Is he nice looking or ugly?              | 0.0 (0.15)  | t(27) < 0 <sup>n.s</sup>    |
|                                     | Is he scary or nice?                     | -0.1 (0.15) | t(27) < 0 <sup>n.s</sup>    |
|                                     | Do you want to play with him or not?     | 0.16 (0.18) | t(27) < 0 <sup>n.s</sup>    |
|                                     | Differences between questions            |             | F(4,17) < 1 <sup>n.s</sup>  |
| Second questionnaire <sup>2,3</sup> | Do you like him?                         | 0.01 (0.18) | t(27) < 0 <sup>n.s</sup>    |
|                                     | Is he a good guy or a bad guy?           | 0.07 (0.17) | t(27) < 0 <sup>n.s</sup>    |
|                                     | Is he nice looking or ugly?              | 0.03 (0.14) | t(27) < 0 <sup>n.s</sup>    |
|                                     | Is he scary or nice?                     | 0.23 (0.14) | t(27) = 1.60 <sup>n.s</sup> |
|                                     | Do you want to play with him or not?     | -0.1 (0.18) | t(27) < 0 <sup>n.s</sup>    |
|                                     | Difference between questions             |             | F(4,17) < 1 <sup>n.s</sup>  |
| Third questionnaire <sup>3</sup>    | Is he a good guy or a bad guy? (left)    | 0.19 (0.16) | t(27) = 1.17 <sup>n.s</sup> |
|                                     | Is he a good guy or a bad guy? (right)   | -0.5 (0.17) | t(27) < 0 <sup>n.s</sup>    |
|                                     | Difference between questions left/right  |             | F(1,20) < 1 <sup>n.s</sup>  |
|                                     | Which one is the nice guy?               | 0.18 (0.14) | t(27) = 1.23 <sup>n.s</sup> |
|                                     | Which one is the bad guy?                | 0.14 (0.13) | t(27) = 1.07 <sup>n.s</sup> |
|                                     | Which one would you like to play with?   | 0.29 (0.13) | t(27) = 2.12 <sup>n.s</sup> |
|                                     | Difference between contrastive question: |             | F(2,19) < 1 <sup>n.s</sup>  |
