# Supplementary material for: Friend or Foe? Early Social Evaluation of Human Interactions
Source: PubMed Central journal article supplement (PMC3929526; doi:10.1371/journal.pone.0088612), 2014-02-19
Supplement: pone.0088612.s002.pdf [file pone.0088612.s002.pdf]

**Table S2: Raw results of Experiment 2**

| subject | antisocial agent | first agent | first action | Coder 1  |          |          |          | Coder 2  |          |          |          |
|---------|------------------|-------------|--------------|----------|----------|----------|----------|----------|----------|----------|----------|
|         |                  |             |              | choice 1 | choice 2 | choice 3 | choice 4 | choice 1 | choice 2 | choice 3 | choice 4 |
| 1       | actor_A          | actor_B     | neg          | 1        | 0        | 0        | 0        | 1        | 0        | 0        | 0        |
| 2       | actor_A          | actor_A     | neg          | 0        | 0        | 0        | 0        | 0        | 0        | 0        | 0        |
| 3       | actor_B          | actor_A     | neg          | 1        | -1       | 0        | 0        | -1       | 1        | 0        | 0        |
| 4       | actor_A          | actor_B     | pos          | -1       | 1        | -1       | 0        | 0        | 1        | -1       | 0        |
| 5       | actor_B          | actor_B     | pos          | 1        | 1        | -1       | 1        | 1        | 1        | -1       | 1        |
| 6       | actor_B          | actor_A     | pos          | 1        | -1       | 1        | -1       | 1        | -1       | 1        | -1       |
| 7       | actor_A          | actor_A     | pos          | -1       | -1       | -1       | 0        | -1       | -1       | -1       | 0        |
| 8       | actor_B          | actor_B     | neg          | 1        | 1        | -1       | 1        | -1       | 1        | -1       | 1        |
| 9       | actor_A          | actor_B     | neg          | 1        | 1        | 1        | -1       | 1        | 1        | 1        | -1       |
| 10      | actor_A          | actor_B     | neg          | 1        | -1       | 1        | 0        | -1       | -1       | 1        | 1        |
| 11      | actor_A          | actor_A     | neg          | -1       | 1        | -1       | -1       | -1       | -1       | -1       | -1       |
| 12      | actor_A          | actor_B     | pos          | 1        | -1       | 1        | 1        | 1        | -1       | 1        | 1        |
| 13      | actor_B          | actor_B     | pos          | 1        | 1        | 0        | 0        | -1       | 1        | 0        | 0        |
| 14      | actor_B          | actor_A     | pos          | 1        | 1        | -1       | -1       | 1        | 0        | 0        | 0        |
| 15      | actor_A          | actor_A     | pos          | 1        | -1       | 1        | -1       | 0        | -1       | 1        | 0        |
| 16      | actor_B          | actor_B     | neg          | 1        | 1        | -1       | 1        | 1        | 1        | -1       | 1        |
| 17      | actor_A          | actor_B     | neg          | 1        | -1       | 1        | 1        | 1        | -1       | 1        | 1        |
| 18      | actor_A          | actor_A     | neg          | 1        | -1       | 1        | -1       | 1        | -1       | 1        | -1       |
| 19      | actor_B          | actor_A     | neg          | 1        | 1        | -1       | -1       | 1        | 0        | 0        | 0        |
| 20      | actor_B          | actor_A     | neg          | 1        | 1        | -1       | 0        | 1        | 1        | -1       | 1        |
| 21      | actor_A          | actor_B     | pos          | -1       | 1        | 1        | 0        | 1        | -1       | -1       | 1        |
| 22      | actor_B          | actor_B     | pos          | -1       | -1       | 1        | -1       | -1       | -1       | 1        | -1       |
| 23      | actor_B          | actor_A     | pos          | -1       | -1       | 1        | -1       | 1        | -1       | 1        | -1       |
| 24      | actor_A          | actor_A     | pos          | 1        | -1       | 1        | -1       | 1        | -1       | 1        | -1       |
| 25      | actor_B          | actor_B     | neg          | 1        | 1        | -1       | -1       | 1        | 1        | -1       | -1       |
| 26      | actor_B          | actor_B     | neg          | -1       | 1        | -1       | 1        | -1       | 1        | -1       | 1        |
| 27      | actor_A          | actor_B     | neg          | 1        | 1        | 1        | -1       | -1       | 1        | 1        | -1       |
| 28      | actor_A          | actor_A     | neg          | 1        | 1        | 0        | 0        | 1        | -1       | 0        | 0        |
| 29      | actor_B          | actor_A     | neg          | 1        | -1       | 1        | -1       | 1        | -1       | 1        | -1       |
| 30      | actor_A          | actor_B     | pos          | -1       | -1       | 1        | -1       | -1       | 0        | 1        | -1       |
| 31      | actor_B          | actor_B     | pos          | -1       | 1        | 1        | -1       | -1       | 1        | 1        | -1       |
| 32      | actor_B          | actor_B     | pos          | 1        | -1       | 1        | 1        | 1        | -1       | 1        | 1        |
| 33      | actor_B          | actor_A     | pos          | 1        | -1       | 1        | 0        | 1        | -1       | 1        | 0        |
| 34      | actor_A          | actor_A     | pos          | -1       | 1        | -1       | 1        | -1       | -1       | -1       | 1        |
| 35      | actor_B          | actor_B     | neg          | 1        | 1        | 1        | -1       | 1        | 1        | 1        | -1       |
| 36      | actor_A          | actor_B     | neg          | -1       | 1        | -1       | 1        | -1       | 1        | -1       | -1       |
| 37      | actor_A          | actor_A     | neg          | 1        | 1        | -1       | 1        | 1        | 1        | -1       | 1        |
| 38      | actor_B          | actor_A     | neg          | 0        | 1        | -1       | -1       | 1        | 1        | -1       | -1       |
| 39      | actor_A          | actor_B     | pos          | 1        | -1       | -1       | 1        | 1        | -1       | 1        | 1        |
| 40      | actor_B          | actor_B     | pos          | 1        | 1        | -1       | 1        | 1        | 1        | -1       | 1        |
| 41      | actor_B          | actor_A     | pos          | 1        | 1        | 1        | 1        | 1        | 1        | 1        | -1       |
| 42      | actor_A          | actor_A     | pos          | 1        | -1       | 1        | 1        | -1       | -1       | 1        | 1        |
| 43      | actor_B          | actor_B     | neg          | -1       | 1        | 1        | 1        | -1       | 1        | 1        | 1        |
| 44      | actor_B          | actor_A     | neg          | 1        | 1        | -1       | 1        | -1       | 1        | -1       | 1        |
| 45      | actor_A          | actor_A     | pos          | -1       | 0        | -1       | 0        | -1       | 1        | -1       | 1        |
| 46      | actor_B          | actor_A     | pos          | 1        | 1        | 1        | 0        | 1        | 1        | 1        | 0        |
| 47      | actor_B          | actor_A     | pos          | 1        | 1        | -1       | 1        | 1        | 1        | -1       | 1        |
